# Supplementary figures and images for: Controlling DOPA adsorption via interacting with polyelectrolytes: layer structure and corrosion resistance
Source: Royal Society of Chemistry journal article supplement (doi:10.1039/d0sm00420k), 2020-01-01

## TOC

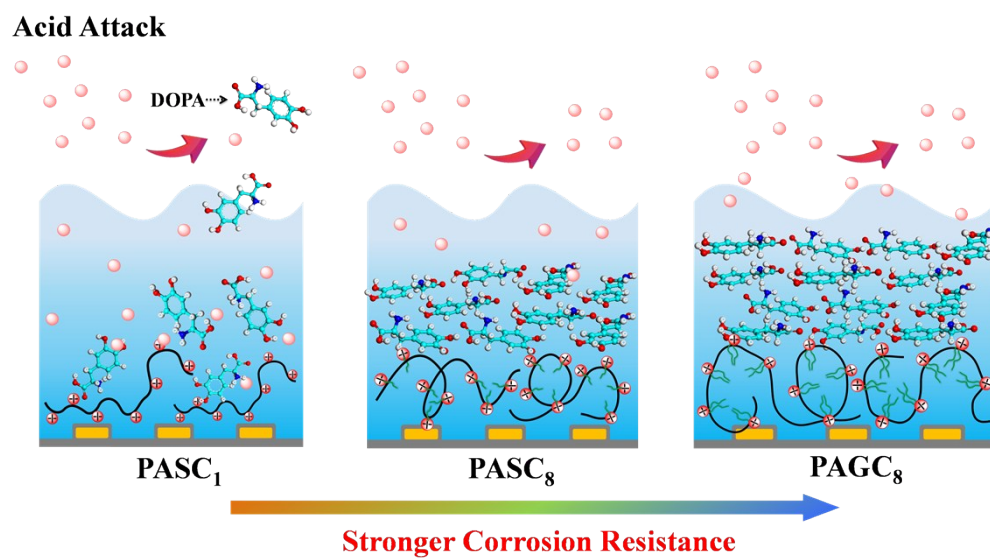

Supplement: d0sm00420k2.pdf [file d0sm00420k2.pdf]
